# Supplementary material for: miR-361-5p Mediates SMAD4 to Promote Porcine Granulosa Cell Apoptosis through VEGFA
Source: PubMed Central journal article supplement (PMC7563248; doi:10.3390/biom10091281), 2020-09-04
Supplement: biomolecules-10-01281-s001.pdf [file biomolecules-10-01281-s001.pdf]

Table S1: specific small inference RNA sequences and microRNA sequence are as following.

| Gene                    | sequence (5'→3')                                                       |
|-------------------------|------------------------------------------------------------------------|
| Negative control        | Sense:UUCUCCGAACGUGUCACGUTT<br>Anti-sense:ACGUGACACGUUCGGAGAATT        |
| VEGFA siRNA             | Sense:GCGAGGCAGCUUGAGUUAATT<br>Anti-sense:UUAACUCAAGCUGCCUCGCTT        |
| Negative control        | Sense:UUCUCCGAACGUGUCACGUTT<br>Anti-sense:ACGUGACACGUUCGGAGAATT        |
| Smad4 siRNA             | Sense:CACCAGGAAUUGAUCUCUCAGGAUU<br>Anti-sense:AAUCCUGAGAGAUCAAUCCUGGUG |
| MiR-361-5p mimic NC     | UUGUACUACACAAAAGUACUG                                                  |
| MiR-361-5p mimic        | UUAUCAGAAUCUCCAGGGGUAC                                                 |
| MiR-361-5p inhibitor NC | CAGUACUUUUGUGUAGUACAA                                                  |
| MiR-361-5p inhibitor    | GUACCCUGGAGAUUCUGAUAA                                                  |

Table S2: qRT-PCR primers were as following:

| Gene  | Accession No.  | Primer sequence (5'→3')                             | Size (bp) | Annealing temperature (°C) |
|-------|----------------|-----------------------------------------------------|-----------|----------------------------|
| VEGFA | XM_013977975.1 | F: ATTTCTGAAGGTAAAGATGCA<br>R: CAGCCCCACAGAGGGTCTCA | 117       | 60                         |
| KDR   | XM_003128987.6 | F: CCCAGTGAGACTCTGTGCG<br>R: CAGGTGTCATAGCGGAAGAAC  | 275       | 60                         |
| GAPDH | AF017079       | F: CGTGTCGGTTGTGGATCT<br>R: CTCAGTGTAGCCCAGGAT      | 120       | 60                         |
| BCL2  | AB271960       | F: TTCTTTGAGTTCGGTGGGG<br>R: CCAGGAGAAATCAAATAGAGGC | 195       | 60                         |

|                |            |                                                             |     |                            |
|----------------|------------|-------------------------------------------------------------|-----|----------------------------|
| BAX            | AJ606301   | F: GATGCCTTTGTGGAGCTGTATG<br>R: CCCGTGGACTTCACTTATGG        | 154 | 60                         |
| Smad4          | NM214072   | F:ATTGGTGTTCATTGCCTAC<br>R:TGGTCACTAAGGCACCTGAC             | 250 | 60                         |
| MiR-361-5p     |            | F:CGCGCTAGCAGCACGTAAAT<br>R:GTGCAGGGTCCGAGGT                |     | 60                         |
| Pre-miR-361-5p | NR029848.1 | F:CAGGGGTACTTATAATTTGAAA<br>AAG<br>R:AGGAGGAGGAAGCAAATCA    | 72  | 60                         |
| U6             |            | F:CGCTTCGGCAGCACATATAC<br>R:TTCACGAATTTGCGTGTCAT            |     | 60                         |
| MiR-361-5p     |            | GTCGTATCCAGTGCAGGGTCCGA<br>GGTATTGCGACTGGATACGACCG<br>CCAAT |     | Stem-loop structure for RT |

*Table S3: Plasmid construction primers are as following*

| Gene            | Primer sequence (5'→3')                                     | Size (bp) | Annealing temperature (°C) |
|-----------------|-------------------------------------------------------------|-----------|----------------------------|
| VEGFA           | F: ATTTCTTGAAGGTAAAGATGCA<br>R: CAGCCCCACAGAGGGTCTCA        | 184       | 56                         |
| MiR361 promoter | F:GAGCTCTAACAAGAGTCTAGGGCAGTG<br>R:CTCGAGATGGTTCCTGCTCTAATC | 182       | 61                         |
| PcDNA3.0-Smad4  | F:ATGGACAATATGTCTATTAC<br>R:TCAGTCTAAAGGCTGTG               | 1948      | 58                         |
